# Supplementary material for: The oncometabolite R-2-hydroxyglutarate activates NF-κB-dependent tumor-promoting stromal niche for acute myeloid leukemia cells
Source: PubMed Central journal article supplement (PMC5006242; doi:10.1038/srep32428), 2016-08-31
Supplement: srep32428-s1.pdf [file srep32428-s1.pdf]

**Manuscript title: The oncometabolite *R*-2-hydroxyglutarate activates NF- $\kappa$ B-dependent tumor-promoting stromal niche for acute myeloid leukemia cells**

Authors: Jing-Yi Chen, You-Syuan Lai, Hui-Jen Tsai, Cheng-Chin Kuo, B. Linju Yen, Su-Peng Yeh, H. Sunny Sun, Wen-Chun Hung

## **Supplemental Figures and Figure Legends**

**Figure S1 to S9**

## **Supplemental Tables**

**Table S1 to S2**

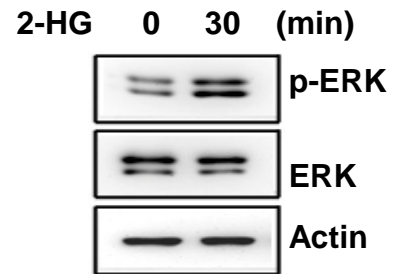

**Supplementary Figure S1.**

***R*-2HG induced ERK activation in stromal cells within 30 min after addition.**

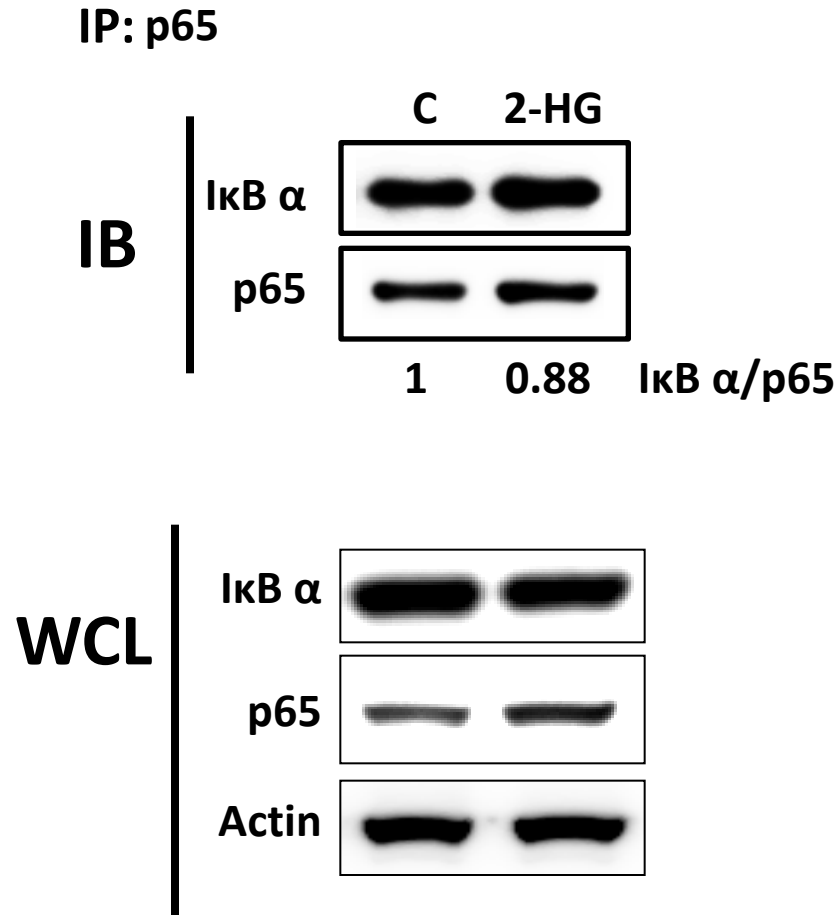

Supplementary Figure S2.

The binding of IκB to p65 was slightly decreased in *R*-2-HG-treated bone marrow stromal cells

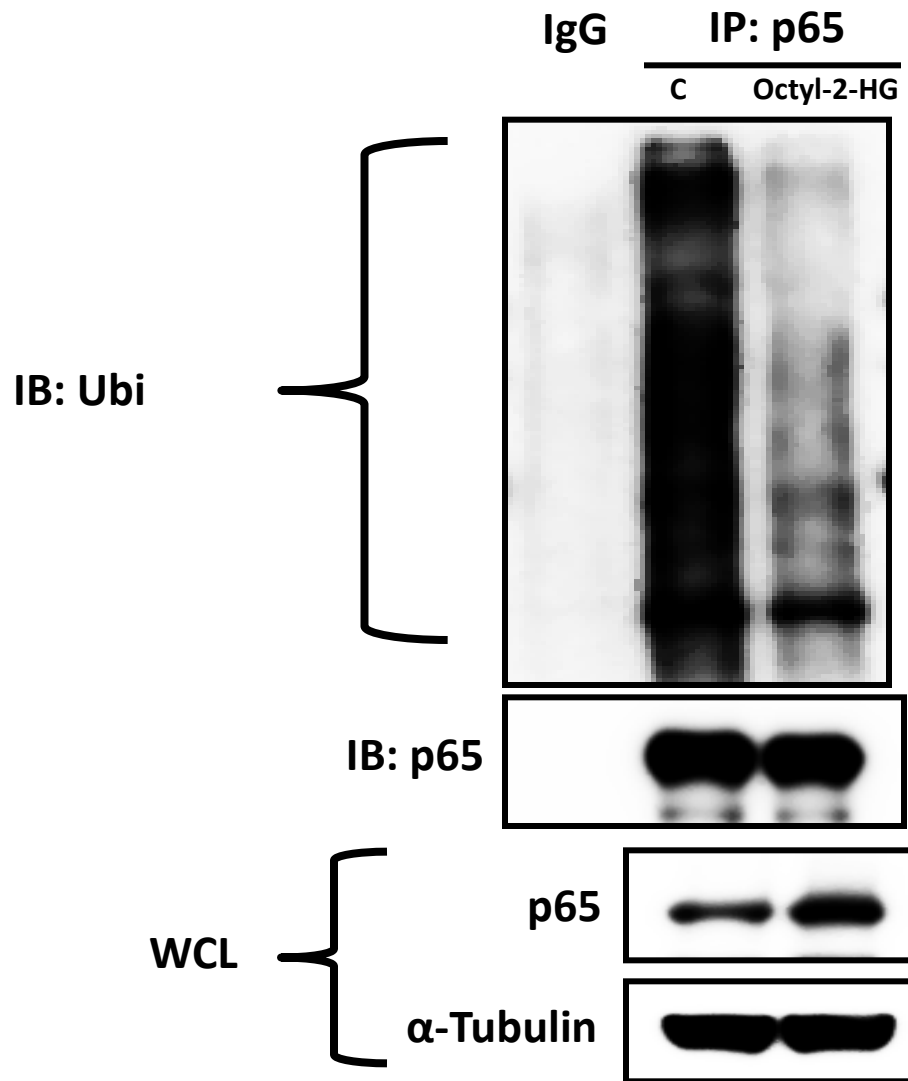

Supplementary Figure S3.

Octyl-*R*-2-HG reduced p65 ubiquitination in stromal cells.

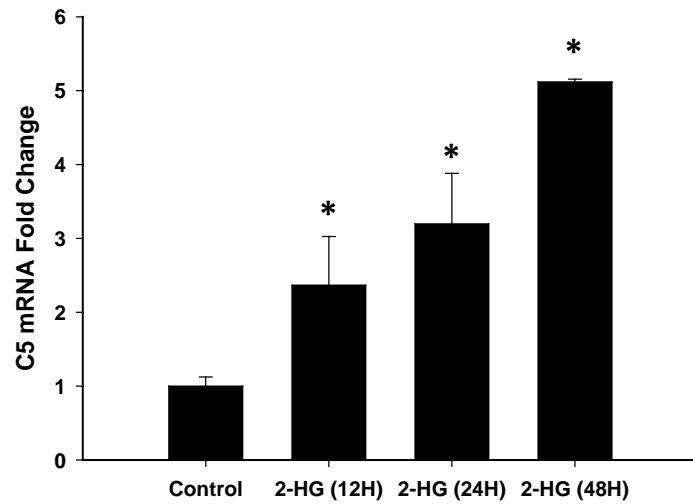

**Supplementary Figure S4.**

**Octyl-R-2-HG increased complementary factor 5 (C5) expression in stromal cells.**

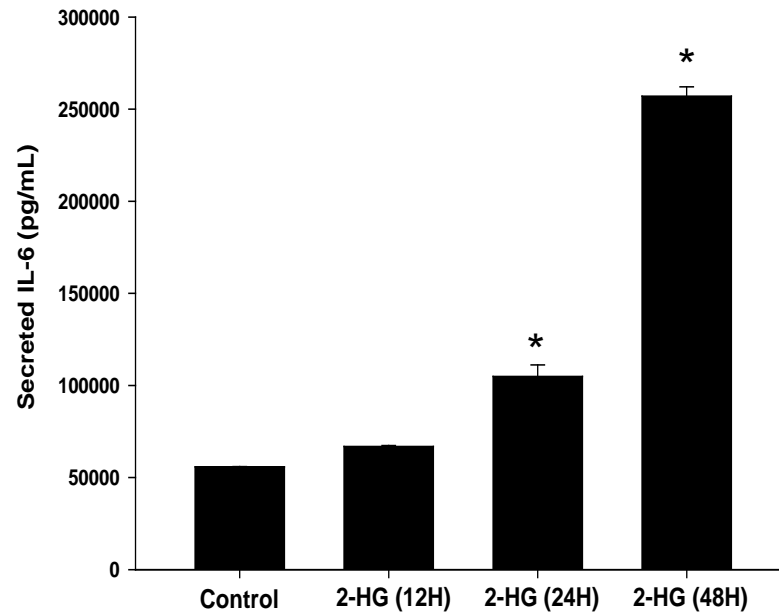

**Supplementary Figure S5.**

**Octyl-*R*-2-HG increased secretion of IL-6 in the conditioned medium of stromal cells.**

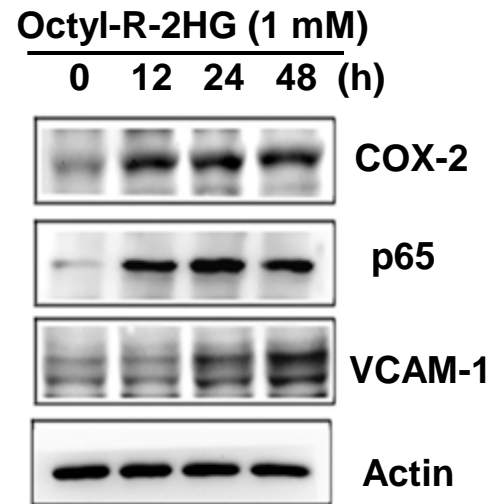

**Supplementary Figure S6.**

**Octyl-R-2-HG increased the protein level of COX-2, p65 and VCAM-1 in stromal cells.**

## StromaNKtert

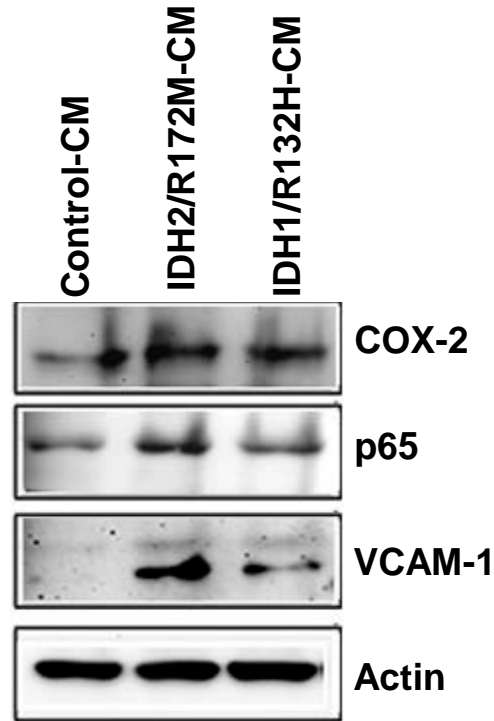

### Supplementary Figure S7.

The conditioned media of KG-1a cells expressing different IDH mutants increased COX-2, p65 and VCAM-1 proteins in stromal cells. KG-1a cells were transfected with control or different IDH mutant expression vectors. After 72 h, the conditioned medium (CM) was collected to treat StromaNKtert cells and the protein level of COX-2, p65 and VCAM-1 was determined.



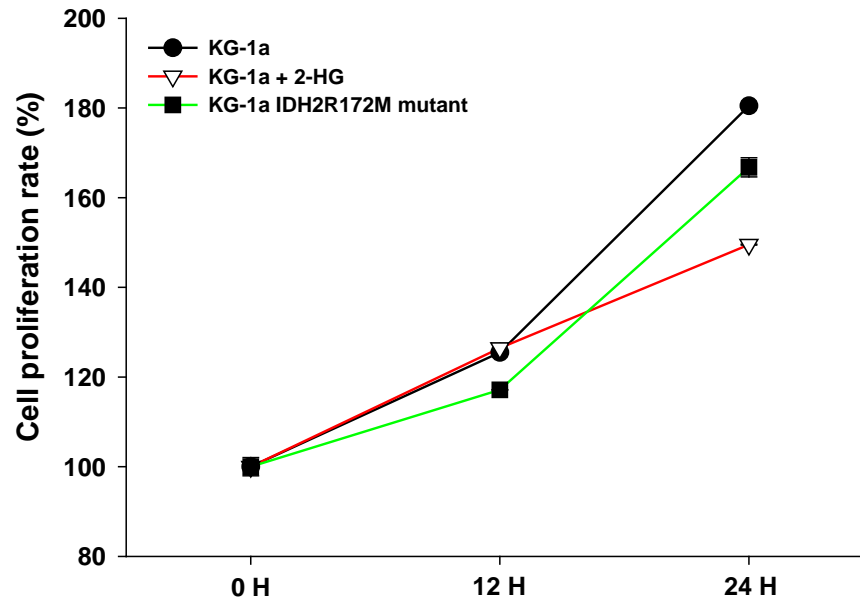

### Supplementary Figure S8.

Treatment of *R*-2HG or expression of IDH2/R172 mutant did not increase the proliferation of KG-1a cells.

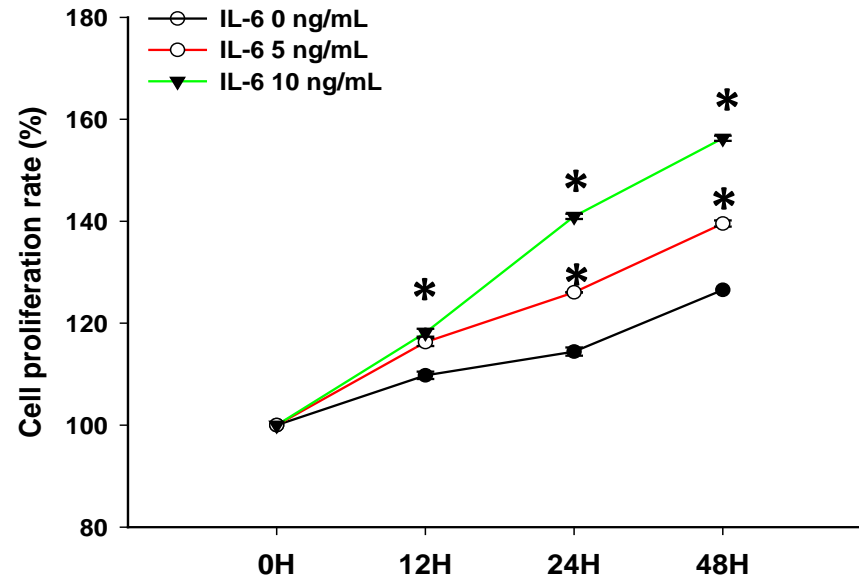

**Supplementary Figure S9.**

**IL-6 stimulated the proliferation of KG-1a cells.**

## Supplementary Table S1: Information of three *IDH*-mutated AML patients

|           | Diagnosis <sup>1</sup> | Age/Gender | Cytogenetics               | Treatment                                  | Outcome             |
|-----------|------------------------|------------|----------------------------|--------------------------------------------|---------------------|
| Patient 1 | AML, M2                | 36/F       | 46 XX [25]                 | Chemotherapy, allogeneic HSCT <sup>2</sup> | Alive, disease free |
| Patient 2 | AML, M1                | 37/F       | 46 XX [25]                 | Chemotherapy                               | Refractory, expired |
| Patient 3 | AML, M1                | 50/F       | 47 XX, +11 [20]; 46 XX [2] | Chemotherapy                               | Relapsed, expired   |

<sup>1</sup> Based on FAB classification and <sup>2</sup> Hematopoietic stem cell transplantation

## Supplementary Table S2: Antibodies and primer sequences used in this study

| <b>Antibody</b> | <b>Source</b>  | <b>Source code</b> | <b>Gene Name</b> | <b>Primer</b>                                                                    |
|-----------------|----------------|--------------------|------------------|----------------------------------------------------------------------------------|
| COX-2           | Santa Cruz     | SC-1745            | COX-2            | forward: 5'-GTCCTTTCAAGGAGAATGGTGC-3'<br>reverse: 5'-GGTCTGGTGCCTGGTCTGATGATG-3' |
| p65             | Invitrogen     | 510500             | IL-6             | forward: 5'-CTTTCGTAACC GCACCCTGG-3'<br>reverse: 5'-TCAGTGTCAGTGCGACTTCC-3'      |
| VCAM-1          | GeneTex        | GTX110684          | VCAM-1           | forward: 5'-CGTCTTGGTCAGCCCTTCCT-3'<br>reverse: 5'- ACATTCATATACTCCCGCATCCTTC-3' |
| Actin           | Millipore      | NAB1501            | p65              | forward: 5'-CACCTAGCTGCC AAAGAAGG-3'<br>reverse: 5'-GGCACAACCTCTTCATCCTC-3'      |
| ERK             | Cell Signaling | 9102s              | SDF-1            | forward: 5'-TCAGCCTGAGCTACAGATGC-3'<br>reverse: 5'-CTTT AGCTTCGGGTCAATGC-3'      |
| p-ERK           | Cell Signaling | 9101s              | VLA4             | forward: 5'-GAGTGCAATGCAGACCTTGA -3'<br>reverse: 5'-TGGATTTGGCTCTGGAAAAC-3'      |
| IκBα            | Santa Cruz     | SC-371             | Actin            | forward: 5'-TGTTACCAACTGGGACGACA-3'<br>reverse: 5'-GGGGTGTTGAAGGTCTCAAA-3'       |
| IKKα/β          | Santa Cruz     | SC-7607            | C5               | forward: 5'-CCAAATGTGTGCGCCAGAAA-3'<br>reverse: 5'-TGGGAACTCCTTTTCGTCTGC-3'      |
| PIN1            | Santa Cruz     | SC-46660           |                  |                                                                                  |
| α-Tubulin       | GeneTex        | GTX628802          |                  |                                                                                  |
| c-Myc           | Santa Cruz     | SC-764             |                  |                                                                                  |
